# Supplementary material for: Assessing floods and droughts in the Mékrou River Basin (WestAfrica): A combined household survey and climatic trends analysis approach
Source: Copernicus journal article supplement (doi:10.5194/nhess-2017-195), 2017-06-20
Supplement: Supplementary file 1 [file nhess-2017-195-supplement.pdf]

## Supplementing Material

S1. Figure 6. Standardized Precipitation Index categorization and associated probability of occurrence (Agnew 2000).

| SPI-n         | Prob. of occurrence | Class            |
|---------------|---------------------|------------------|
| <1.65         | 0.05                | Extremely wet    |
| 1.28 / 1.64   | 0.1                 | Severely wet     |
| 0.84 / 1.27   | 0.2                 | Moderately wet   |
| -0.84 / 0.84  | 0.5                 | Normal           |
| -1.28 / -0.83 | 0.2                 | Moderate drought |
| -1.65 / -1.27 | 0.1                 | Severe drought   |
| <-1.65        | 0.05                | Extreme drought  |

S2. Figure 7: Mean Annual Precipitation, Standard Deviation and Coefficient of Variation (%) of the entire time series available (CHIRPS 1981-2016), in the Mékrou river basin.

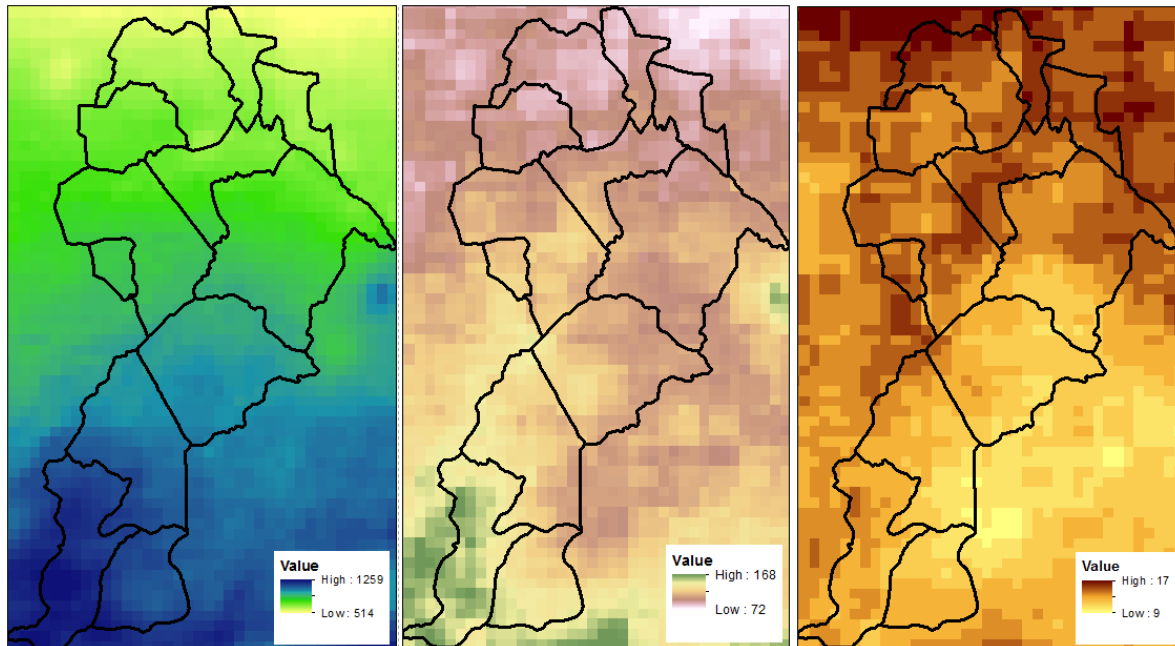

S3. Figure 8: Number of Wet/Dry events per administrative area and SPI type.

|           | SPI-3 |     | SPI-6 |     |          | SPI-3 |     | SPI-6 |     |          | SPI-3        |     | SPI-6 |     |
|-----------|-------|-----|-------|-----|----------|-------|-----|-------|-----|----------|--------------|-----|-------|-----|
|           | W.e   | D.e | W.e   | D.e |          | W.e   | D.e | W.e   | D.e |          | W.e          | D.e | W.e   | D.e |
|           | Benin |     |       |     |          | Niger |     |       |     |          | Burkina Faso |     |       |     |
| Kouandé   | 2     | 1   | 3     | 2   | Park W   | 1     | 0   | 0     | 1   | Tansarga | 1            | 0   | 1     | 0   |
| Pehúnco   | 2     | 2   | 2     | 2   | Tamou    | 2     | 2   | 0     | 2   | Diapaga  | 1            | 0   | 1     | 1   |
| Kérou     | 2     | 1   | 2     | 1   | Kirtachi | 1     | 2   | 0     | 2   | Bottou   | 2            | 0   | 0     | 1   |
| Banikoara | 1     | 3   | 2     | 2   | Falmey   | 2     | 2   | 2     | 2   |          |              |     |       |     |
| Karimama  | 1     | 2   | 1     | 1   | Falmey   | 2     | 2   | 2     | 2   |          |              |     |       |     |

S4. Figure 9: Temporal profile of SPI-3 (JJA) and SPI-6 (AMJJAS). Area percentage per administrative unit affected by different anomaly categories

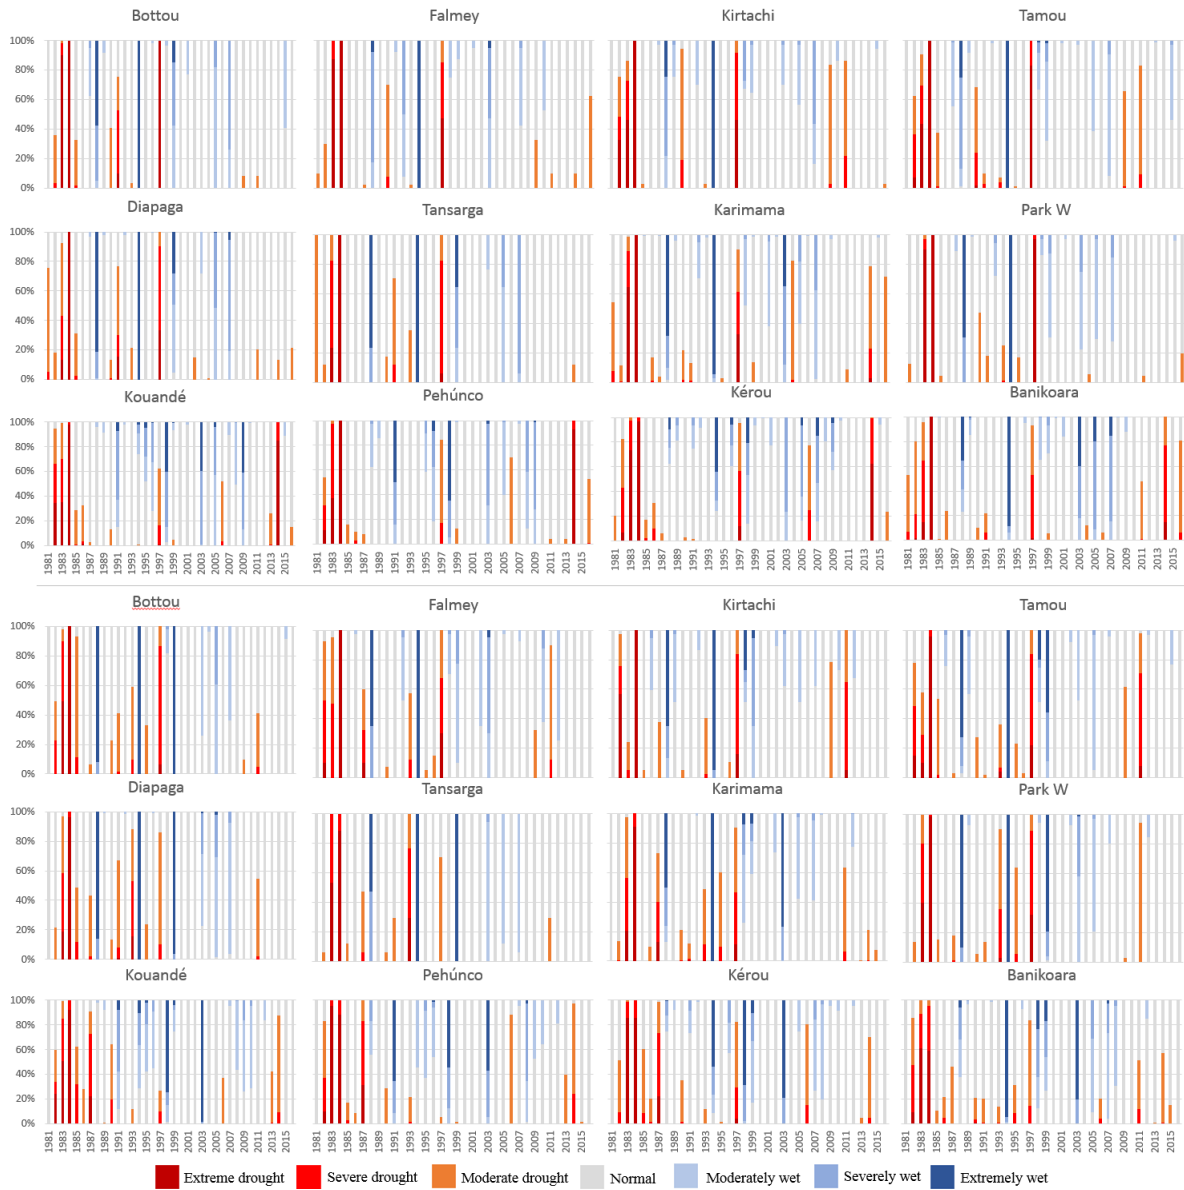

S5: Figure 10: Mean Heat Wave Magnitude Index for the entire Area of Influence and 5-year moving average.

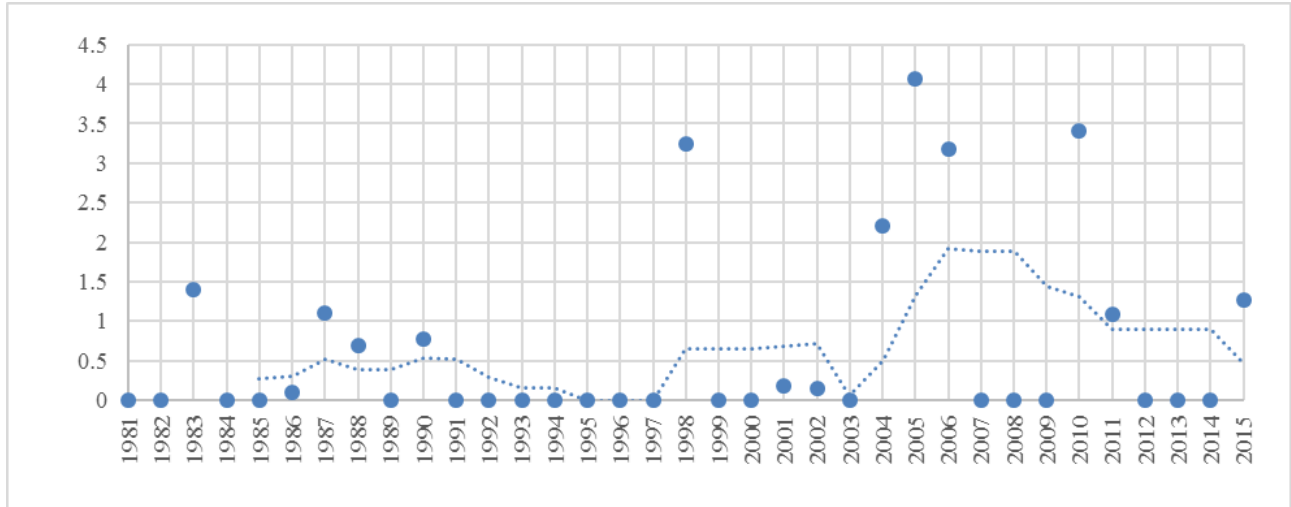

S6: Figure 11: Temporal profile of Heat Wave Magnitude Index per Administrative Area

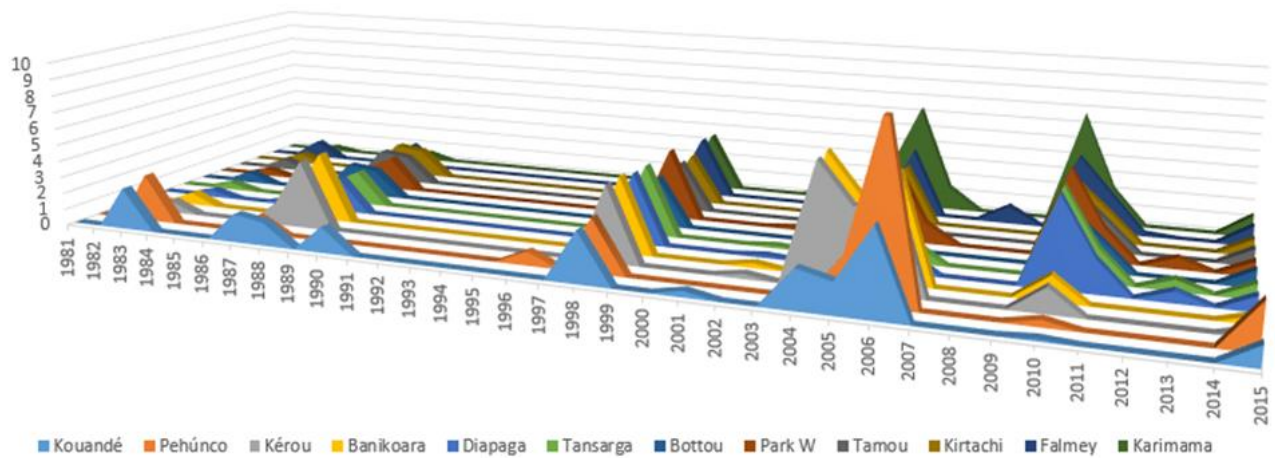

S7. Figure 12: Monthly average discharge at Barou station as modelled in SWAT for the period 1998-2012; in blue the average; dashed red line is cumulated flow in cubic meter.

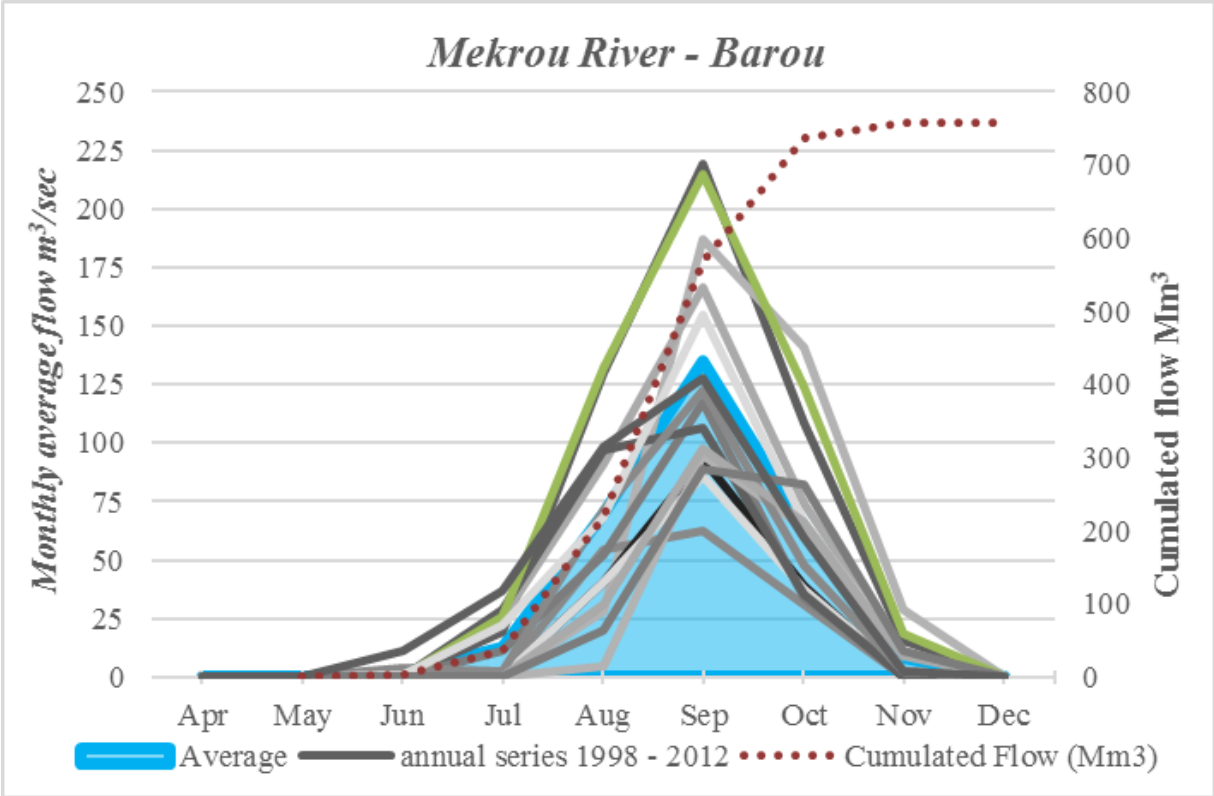

S8. Figure 13: Annual water flow (Mm3) in several subbasin in the Mekrou.
